# Supplementary material
Source: PubMed Central journal article supplement (PMC4112410)
Supplement: NIHMS581142-supplement-supplement.pdf [file NIHMS581142-supplement-supplement.pdf]

Supplemental Information for: Price et al, “Effects of Ketamine on Explicit and Implicit Suicidal Cognition: A Randomized Controlled Trial in Treatment-Resistant Depression”

**Methods: Implicit Association Test**

The Implicit Association Test (IAT; {Greenwald, 1998 #19}) assesses the relative speed with which individuals classify words when the same manual key response is required for two constructs. Words appear one at a time in the center of the screen and must be classified as belonging to a concept (e.g., death/life) or attribute (e.g., me/not me) listed at the upper right of the screen (right key press) or at the upper left of the screen (left key press; see Figure S1 below). The critical comparison in behavioral performance is made when the concept-attribute pairing (e.g., “me” and “death”) is swapped (such that “me” and “life” now require the same key press). If such a swap in pairings results in decreased efficiency on the task in a given participant, the implication is that the second concept-attribute pairing is less strongly associated than the first.

**Figure S1.**

**Schematic of Implicit Association Task**

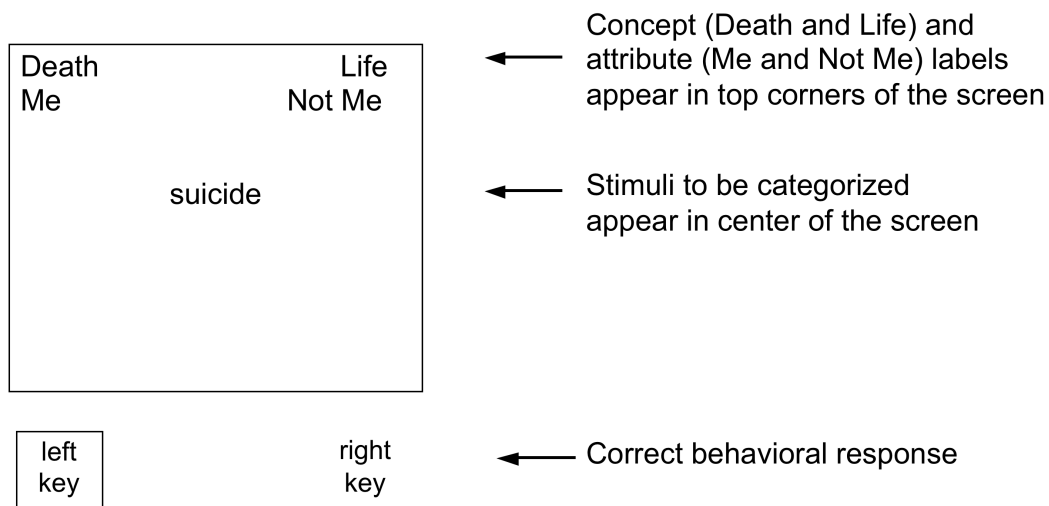

In the current study, two variants of the IAT were used to behaviorally assess the strength of association between “Escape” words and “Me” words (Escape=Me IAT) and between “Death” words and “Me” words (Death=Me IAT). IATs were administered and scored in accordance with recommended procedures<sup>[31]</sup> and as described in our previous report<sup>[12]</sup>. Reaction times (RTs) were recorded for each word. If an incorrect key response was made, a red X appeared on the screen above the word, and the current trial continued until the participant made a correct response. D-scores were calculated for each

participant, for each IAT, where  $D = \frac{(\text{mean RT during Escape=Me [or Death=Me] block}) - (\text{mean RT during Stay=Me [or Life=Me] block})}{(\text{SD of RT across all trials})}$ . Thus, for example, faster responses when “death” words and “me” words both required a left finger response, relative to when “life” words and “me” words both required a left finger response, indicated an implicit association between death and me, and resulted in a positively valenced D-score.

The following word stimuli were used for the Death=Me and Escape=Me IAT variants.

**(1) Death = Me IAT: Does the participant associate Death with the Self?**

| <b>DEATH</b> | <b>LIFE</b> | <b>ME</b> | <b>NOT ME</b> |
|--------------|-------------|-----------|---------------|
| Suicide      | Alive       | I         | They          |
| Die          | Live        | Myself    | Them          |
| Dead         | Survive     | My        | Their         |
| Deceased     | Thrive      | Mine      | Other         |
| Lifeless     | Breathing   | Self      | Theirs        |

**(2) Escape = Me IAT: Does the participant associate Escape with the Self?**

| <b>ESCAPE</b> | <b>STAY</b> | <b>ME</b> | <b>NOT ME</b> |
|---------------|-------------|-----------|---------------|
| Exit          | Continue    | I         | They          |
| Quit          | Remain      | Myself    | Them          |
| End           | Hold on     | My        | Their         |
| Leave         | Persist     | Mine      | Other         |
| Depart        | Endure      | Self      | Theirs        |
